# Supplementary material for: Examining the Variability in Adrenal Cortical Suppression Among Patients Receiving Etomidate for General Anesthesia in Morning vs. Evening Sessions: A Randomized Clinical Trial
Source: Research Square preprint supplement (doi:10.21203/rs.3.rs-7463117/v1), 2026-01-09
Supplement: Supplementary file 1 [file 1282ad6058dd2005a6cdca87.docx]

**Examining the Variability in Adrenal Cortical Suppression Among Patients Receiving Etomidate for General Anesthesia in Morning vs. Evening Sessions: A Randomized Clinical Trial**

Lingli Zhu1,2, YulongWang1, Yuefeng Wang1, Jiankang He1, Qiubo Wang1, Tao Wang1, Chuchu Du1, Mengjuan Dong1, Ling Guo1, Hao Cheng1, Wei Chen1,*, Yongquan Chen1,*

Lingli Zhu, YulongWang and Yuefeng Wang contributed equally to this work.

1Department of Anesthesiology, The First Affiliated Hospital of Wannan Medical College, Wuhu, 241000, China,

2Department of Anesthesiology, Sir Run Run Shaw Hospital, Zhejiang University School of Medicine (Ningguo Branch) & Ningguo People's Hospital, Ningguo, 242300, China

*Corresponding author, Email: Wei chen, [874277327@qq.com;](mailto:874277327@qq.com;) Yongquan Chen, [chenyq263@163.com](mailto:chenyq263@163.com)

Conflicts of Interests/Financial Disclosures: None

**Table S1. The effect of etomidate on the levels of adrenal cortex-related hormones in Elderly patients**

| **Outcome** | **Group M (n = 19)** | **Group E (n = 17)** | ***P* value** |
| --- | --- | --- | --- |
| Cortisol | 26.8%±13.9% | 39.9%±16.4% | 0.0136 |
| Aldosterone | 23.2% ±28.7% | 46.2% ±23.5% | 0.0133 |
| ACTH | -17.8% [-52.2%, 23.8%] | -33.3% [-209.6%, 4.3%] | 0.1234 |

Cortisol and Aldosterone were presented as mean with standard deviation (mean ± SD); ACTH was expressed as medians with interquartile range [median (Q1, Q3)]. ACTH, adrenocorticotropic hormone. Elderly patient (≥ 65 years).

**Table S2. Postoperative recovery status of the study Elderly patients**

| **Outcome** | **Group M (n = 19)** | **Group E (n = 17)** | ***P* value** |
| --- | --- | --- | --- |
| Emergence time (min) | 20.0±8.4 | 23.4±9.0 | 0.249 |
| Extubation time (min) | 20.6±8.6 | 24.8±10.9 | 0.206 |
| PACU stay time (min) | 53.1±10.0 | 57.4±14.1 | 0.294 |
| Postoperative Stay (day) | 5 (3, 7) | 5 (4, 6) | 0.626 |
| PONV score ≥3 |  |  |  |
| PoH 6 | 5 (26.3) | 3 (17.7) | 0.532 |
| PoD 1 | 3 (15.8) | 1 (5.9) | 0.345 |
| PoD 3 | 1 (5.3) | 0 (0) | 0.337 |
| Pain score |  |  |  |
| PoH 6 | 2 (2, 4) | 2 (2, 3.5) | 0.926 |
| PoD 1 | 2 (2, 2) | 2 (2, 2) | 0.343 |
| PoD 3 | 1 (1, 1) | 1 (1, 1) | ＞0.999 |
| QoR-15 scores on PoD 3 | 95±12 | 98±15 | 0.443 |
| Postoperative complications | 1 (5.3) | 3 (17.7) | 0.238 |

Emergence and extubation time, PACU stay time and QoR-15 scores on PoD 3 were presented as mean with standard deviation (mean±SD); Postoperative stay and pain scores were expressed as medians with interquartile range [median (Q1, Q3)]; POVN scores, as well as postoperative complications, count with percent [n (%)]. Elderly patient (≥ 65 years); PACU presents as Postanesthesia Care Unit; PoH as Postoperative Hour; PoD as Postoperative Day; PONV as Postoperative Nausea and Vomiting; QoR as Quality of Recovery-15.


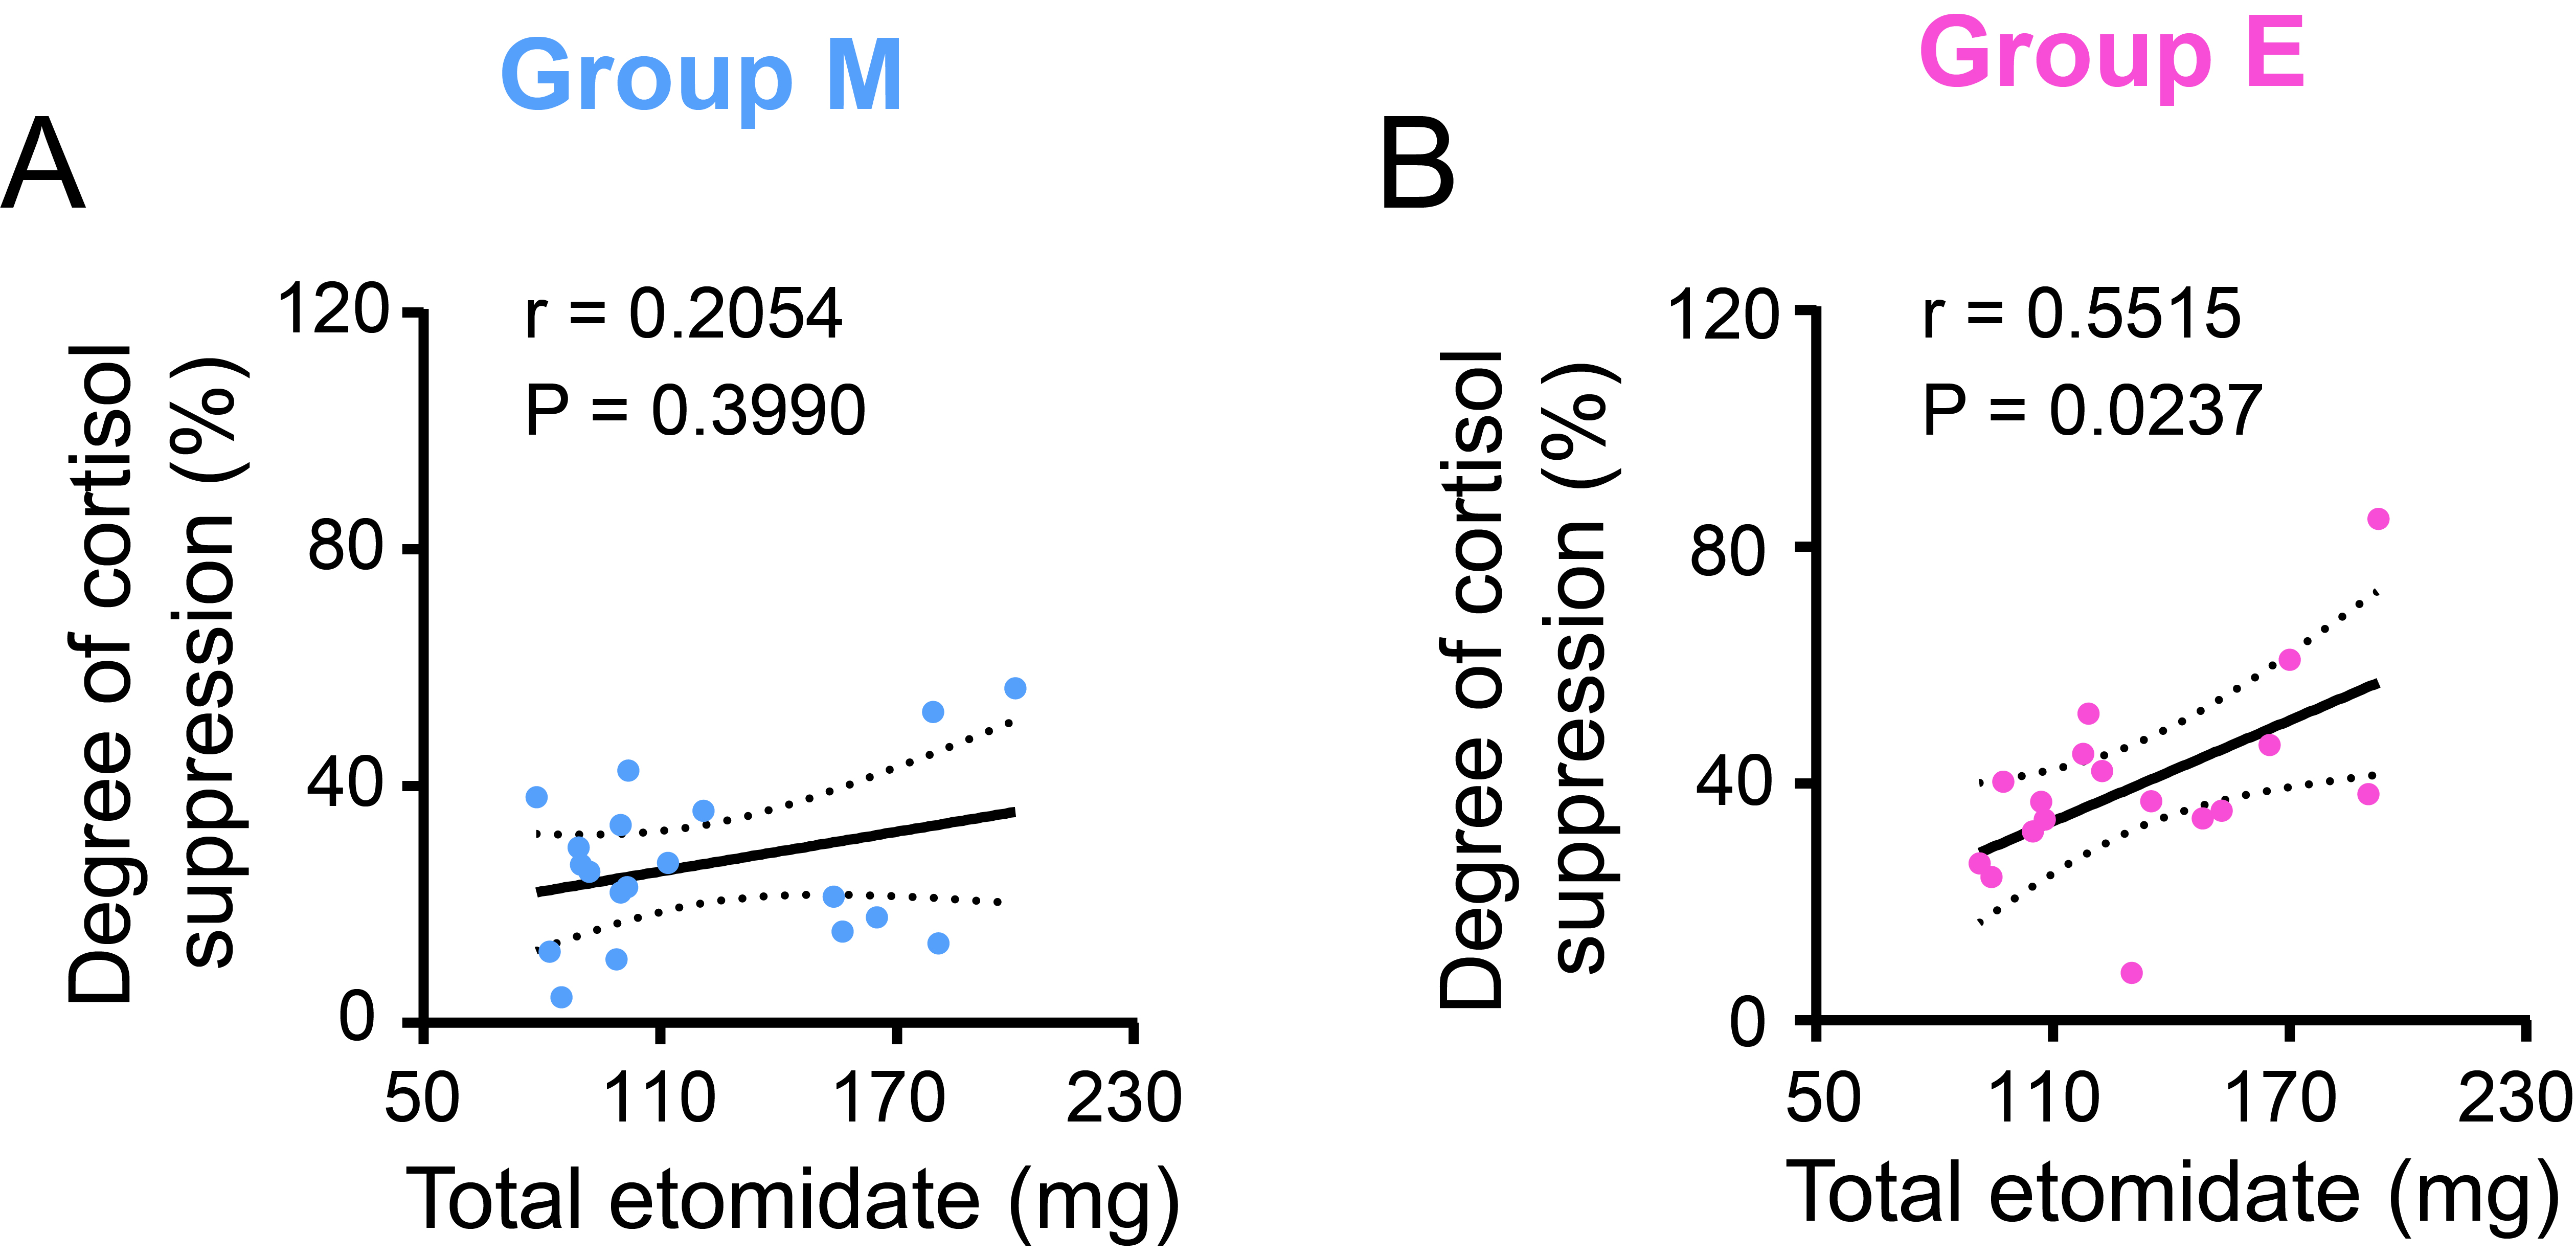


**Figure S1. The correlation between degree of cortisol suppression and the total etomidate administered.** Spearman r test was used; M, morning; E, evening.
